# Supplementary material for: Mn(ii) metal–organic frameworks based on Mn3 clusters: from 2D layer to 3D framework by the “pillaring” approach
Source: Royal Society of Chemistry journal article supplement (doi:10.1039/c2ce26734a), 2012-12-10
Supplement: c2ce26734a.pdf [file c2ce26734a.pdf]

## Supporting Information

### **Mn(II) Metal-Organic Frameworks Based on Mn<sub>3</sub> Clusters: From 2D Layer to 3D Framework by the “Pillaring” Approach**

Yong-Qiang Chen, Sui-Jun Liu, Yun-Wu Li, Guo-Rong Li, Kun-Huan He, Ze Chang\* and Xian-He Bu

*Department of Chemistry, Tianjin Key Lab on Metal and Molecule-based Material Chemistry, Nankai University, Tianjin 300071, China*

\* Corresponding author. E-mail: [changze@nankai.edu.cn](mailto:changze@nankai.edu.cn). Fax: +86-22-23498361.

**Table S1.** Selected bond distances (Å) and angles (°) for complexes **1** and **2**

| <b>1</b>             |            |                     |            |
|----------------------|------------|---------------------|------------|
| Mn(1)–O(1)           | 2.222(3)   | Mn(2)–O(1)          | 2.274(3)   |
| Mn(2)–O(2)           | 2.252(3)   | Mn(1)#1–O(3)        | 2.102(3)   |
| Mn(2)#1–O(4)         | 2.061(3)   | Mn(2)#2–O(5)        | 2.195(3)   |
| Mn(2)#2–O(6)         | 2.308(3)   | Mn(1)–O(7)          | 2.197(4)   |
| Mn(2)–O(11)          | 2.193(4)   | Mn(1)–O(7)#5        | 2.197(4)   |
| Mn(1)–O(3)#4         | 2.102(4)   | Mn(1)–O(3)#5        | 2.102(4)   |
| Mn(1)–O(1)#5         | 2.222(3)   | Mn(2)–O(4)#3        | 2.061(3)   |
| Mn(2)–O(5)#6         | 2.195(3)   | Mn(2)–O(6)#6        | 2.308(3)   |
| Mn(1)–O(1)–Mn(2)     | 112.06(13) | O(7)–Mn(1)–O(3)#4   | 92.63(17)  |
| O(7)#3–Mn(1)–O(3)#4  | 87.37(17)  | O(7)#3–Mn(1)–O(3)#5 | 92.63(17)  |
| O(7)–Mn(1)–O(1)      | 90.47(15)  | O(7)#3–Mn(1)–O(1)   | 89.53(15)  |
| O(3)#4–Mn(1)–O(1)    | 85.29(15)  | O(3)#5–Mn(1)–O(1)   | 94.71(15)  |
| O(7)–Mn(1)–O(1)#3    | 89.53(15)  | O(7)#3–Mn(1)–O(1)#3 | 90.47(15)  |
| O(3)#4–Mn(1)–O(1)#3  | 94.71(15)  | O(3)#5–Mn(1)–O(1)#3 | 85.29(15)  |
| O(4)#4–Mn(2)–O(11)   | 96.30(18)  | O(4)#4–Mn(2)–O(5)#6 | 104.95(17) |
| O(11)–Mn(2)–O(5)#6   | 91.76(17)  | O(4)#4–Mn(2)–O(2)   | 159.25(17) |
| O(11)–Mn(2)–O(2)     | 86.95(17)  | O(5)#6–Mn(2)–O(2)   | 95.40(16)  |
| <b>2</b>             |            |                     |            |
| Mn(1)–O(1)           | 2.109(4)   | Mn(1)–N(1)          | 2.242(5)   |
| Mn(1)–O(6)#2         | 2.341(4)   | Mn(2)#3–O(2)        | 2.060(4)   |
| Mn(2)–O(3)           | 2.054(4)   | Mn(2)#4–O(5)        | 2.230(4)   |
| Mn(2)#4–O(6)         | 2.325(4)   | Mn(2)#6–N(2)        | 2.185(5)   |
| O(1)#1–Mn(1)–N(1)    | 93.91(16)  | O(1)–Mn(1)–N(1)     | 86.09(16)  |
| O(1)#1–Mn(1)–O(6)#2  | 93.50(15)  | O(1)–Mn(1)–O(6)#2   | 86.50(15)  |
| N(1)–Mn(1)–O(6)#2    | 94.20(17)  | N(1)#1–Mn(1)–O(6)#2 | 85.80(17)  |
| Mn(2)#4–O(6)–Mn(1)#5 | 110.10(16) | O(3)–Mn(2)–O(2)#7   | 103.38(18) |

---

|                     |            |                     |            |
|---------------------|------------|---------------------|------------|
| O(3)–Mn(2)–N(2)#8   | 99.49(18)  | O(2)#7–Mn(2)–N(2)#8 | 99.68(18)  |
| O(3)–Mn(2)–O(5)#9   | 97.57(19)  | O(2)#7–Mn(2)–O(5)#9 | 157.14(17) |
| N(2)#8–Mn(2)–O(5)#9 | 85.63(18)  | O(3)–Mn(2)–O(6)#9   | 129.66(17) |
| O(2)#7–Mn(2)–O(6)#9 | 101.43(15) | N(2)#8–Mn(2)–O(6)#9 | 118.51(17) |
| O(5)#9–Mn(2)–O(6)#9 | 57.30(15)  |                     |            |

\*Symmetry modes: **1:** #1  $x + 2, y, z - 1$ , #2  $x + 1, y + 1, z$ , #3  $-x - 2, -y - 1, -z + 2$ , #4  $x - 2, y, z + 1$ , #5  $-x, -y - 1, -z + 1$ , #6  $x - 1, y - 1, z$ ; **2:** #1  $-x - 1, -y + 1, -z + 1$ , #2  $x - 2, y, z + 1$ , #3  $x - 1, y + 1, z + 1$ , #4  $x + 1, y + 1, z$ , #5  $x + 2, y, z - 1$ , #6  $x, y, z + 1$ , #7  $x + 1, y - 1, z - 1$ , #8  $x, y, z - 1$ , #9  $x - 1, y - 1, z$ .

---

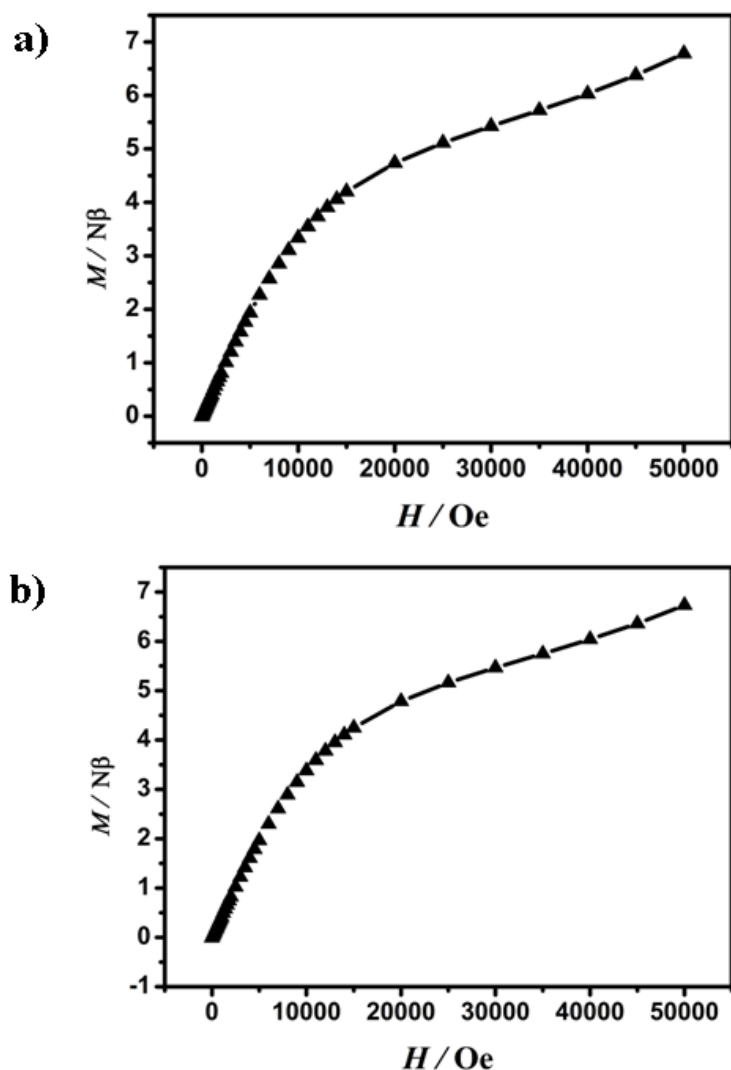

**Figure S1.** The  $M$  vs.  $H$  plots for **1** (a) and **2** (b) measured at 2 K.

**The isotropic Heisenberg spin Hamiltonian:**

$$\chi_M T = \frac{Ng^2\beta^2}{3k} \frac{\sum_{S_B, S_T} S_T(S_T+1)(2S_T+1) \exp\left[-\frac{E(S_B, S_T)}{kT}\right]}{\sum_{S_B, S_T} (2S_T+1) \exp\left[-\frac{E(S_B, S_T)}{kT}\right]} = \frac{Ng^2\beta^2}{k}$$

$$\frac{8.75 + 2.5 \exp(-5x) + 21 \exp(-7x) + 9 \exp(-10x) + 2.5 \exp(-13x) + 41.5 \exp(-16x) + 21 \exp(-17x) + 8.75 \exp(-18x) + 2.5 \exp(-19x)}{3 + 2 \exp(-5x) + 4 \exp(-7x) + 4 \exp(-10x) + 2 \exp(-13x) + 6 \exp(-16x) + 4 \exp(-17x) + 3 \exp(-18x) + 2 \exp(-19x)}$$

$$\frac{2.5 \exp(-23x) + 8.75 \exp(-24x) + 21 \exp(-25x) + 41.25 \exp(-26x) + 71.5 \exp(-27x) + 8.75 \exp(-28x) + 8.75 \exp(-30x)}{2 \exp(-23x) + 3 \exp(-24x) + 4 \exp(-25x) + 5 \exp(-26x) + 6 \exp(-27x) + 3 \exp(-28x) + 3 \exp(-30x)}$$

$$\frac{21 \exp(-31x) + 41.25 \exp(-34x) + 21 \exp(-35x) + 71.5 \exp(-37x) + 155 \exp(-40x) + 71.5 \exp(-45x) + 113.75 \exp(-50x) + 170 \exp(-55x)}{4 \exp(-31x) + 5 \exp(-34x) + 4 \exp(-35x) + 6 \exp(-37x) + 12 \exp(-40x) + 6 \exp(-45x) + 7 \exp(-50x) + 8 \exp(-55x)}$$

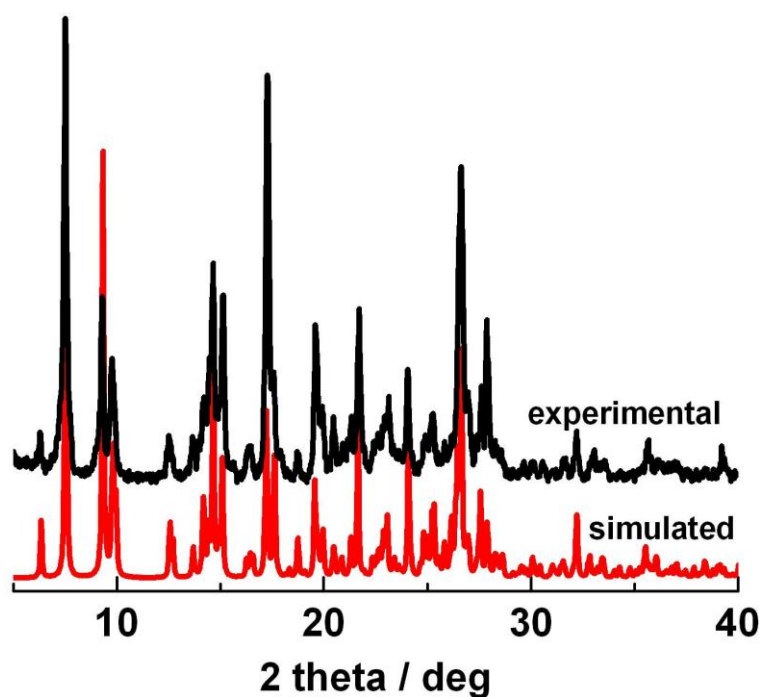

**Figure S2.** The simulative (red line) and experimental (black line) powder X-ray diffraction pattern for complex 1.

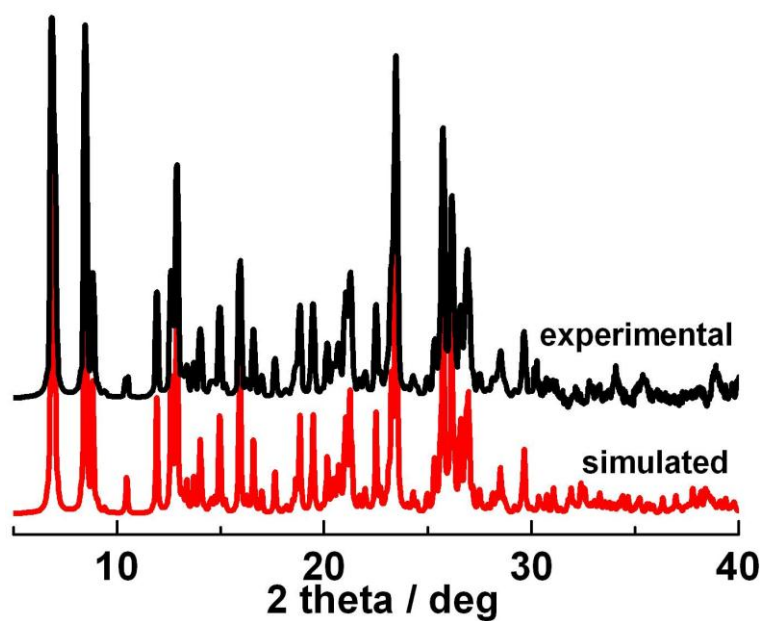

**Figure S3.** The simulative (red line) and experimental (black line) powder X-ray diffraction pattern for complex 2.

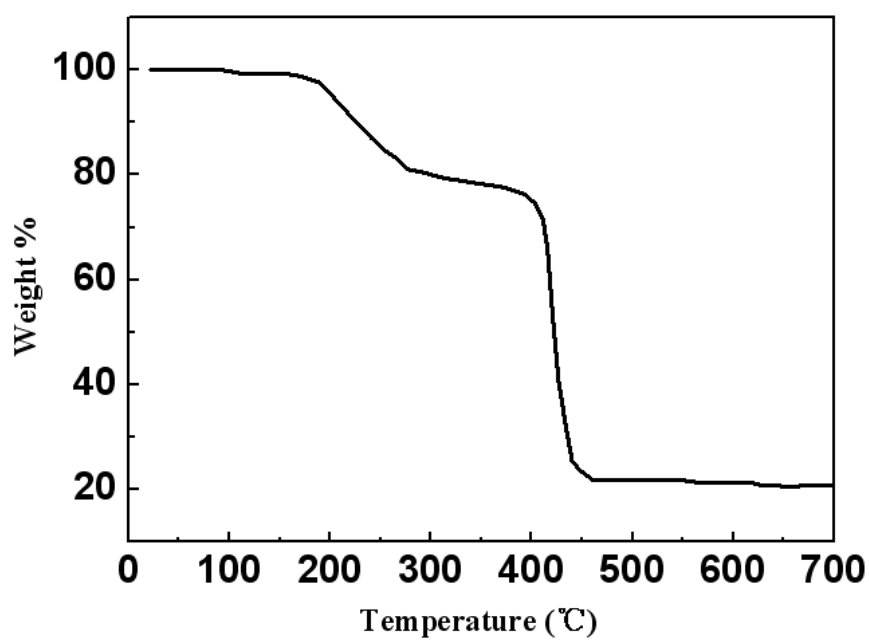

**Figure S4.** The TG curve of complex 1.

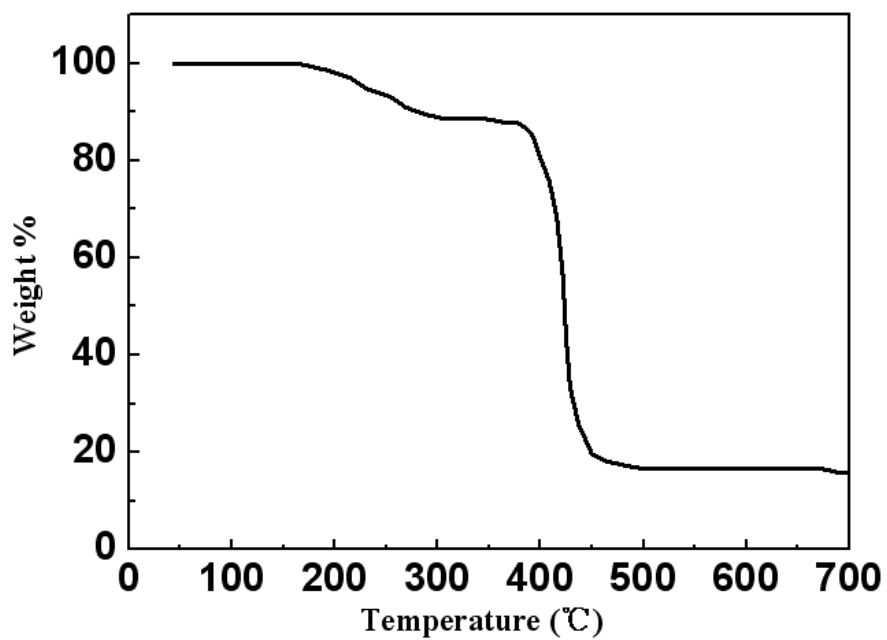

**Figure S5.** The TG curve of complex 2.
